# Supplementary material for: More than one way: exploring the capabilities of different estimation approaches to joint models for longitudinal and time-to-event outcomes
Source: publisher site journal article supplement (doi:10.1515/ijb-2020-0067), 2021-04-05
Supplement: Supplementary file 1 [file Readme.pdf › Readme.pdf]

# 1 Unpack Reproduction.zip-File

Please, unpack the Reproduction.zip-File. A folder “Simulation\_Study” will have been created. You will find two R-files in this folder and 3 subfolders:

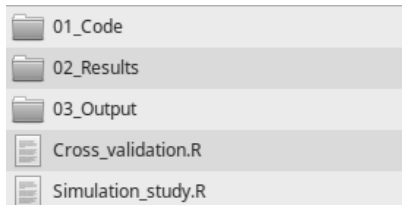

**Do not change any folder or file names!**

For reproducing the simulation study, please, execute „Simulation\_study.R“

For reproducing the cross validation results, please, execute „Cross\_validation.R“ (discouraged!)

## 2 Simulation Study

This code will run approx. 4.5 days on a computer with an Intel(R) i5-2400 CPU @ 3.1 GHz processor and 8 GB RAM. We recommend running the code in one go with settings `SAVE = F`.

### Setting the directory in the code (path)

In order for the code to run smoothly, please, enter the path to the folder „Simulation\_Study“ in line 20.

Before

```
17 ## #####  
18 ## Please set me to the directory this source code lies in -----  
19  
20 path <- ""  
21
```

After

```
17 ## #####  
18 ## Please set me to the directory this source code lies in -----  
19  
20 path <- "/home/user/Downloads/Simulation_Study/"  
21
```

### The use of SAVE

Setting `SAVE <- T` in line 22 will save all estimation results. This is recommended if you do not want to run the simulation study in one go. Required disk space: 19 GB.

### 3 Cross validation

#### **WE DO NOT RECOMMEND TO RE-RUN THE CROSS VALIDATION ON A SINGLE COMPUTER!**

The cross validation is computationally very expensive (several days on 80+ kernels; see preamble of „Cross\_validation.R“ for more information).

If you would still like to run it:

- Read through the preamble of the code carefully and make adaption to function arguments (e.g. number of kernels) if needed.
- Do set the path argument in line 54 of „Cross\_validation.R“ analogously to the instructions in the previous section.
- **Keep in mind that the provided results for the cross validation will be overwritten.**
- Wait :).
